# Supplementary material for: Fluorescent water-soluble probes based on dendritic PEG substituted perylene bisimides: synthesis, photophysical properties, and live cell images
Source: Royal Society of Chemistry journal article supplement (doi:10.1039/c2jm30168g), 2012-01-01
Supplement: c2jm30168g.pdf [file c2jm30168g.pdf]

## Fluorescent Water-soluble Probes Based on Dendritic PEG Substituted Perylene Bisimides: Synthesis, Photophysical properties and Live Cell Image

Hongmei Liu,<sup>a, c</sup> Yongli Wang,<sup>b</sup> Chenghui Liu,<sup>a, c</sup> Hongxia Li,<sup>a</sup> Baoxiang Gao,<sup>\*a, c</sup> Licui Zhang,<sup>a</sup> Fuli Bo,<sup>a</sup> Qianqian Bai,<sup>a</sup> Xinwu Ba<sup>a, c</sup>

<sup>a</sup> College of Chemistry and Environmental Science, Hebei University, Baoding, 071002, P. R. China. Fax: +86 3125079317, E-mail: [bxgao@hbu.edu.cn](mailto:bxgao@hbu.edu.cn)

<sup>b</sup> School of Basic Medicine, Hebei University, Baoding, 071002, P. R. China.

<sup>c</sup> Key Laboratory of Medicinal Chemistry and Molecular Diagnosis, Ministry of Education, Hebei University, Baoding, 071002, P. R. China.

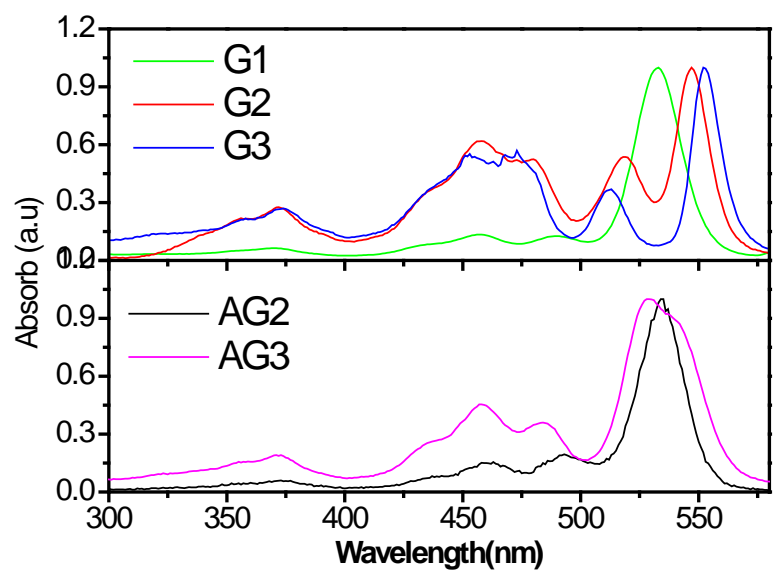

Figure S1 the excitation spectra of compound **AG2**, **AG3**, **G1**, **G2**, and **G3**  
in water medium

$^1\text{H}$ -NMR spectrum and MALDI-TOF spectrum of the dendritic PEG substituted perylene bisimides

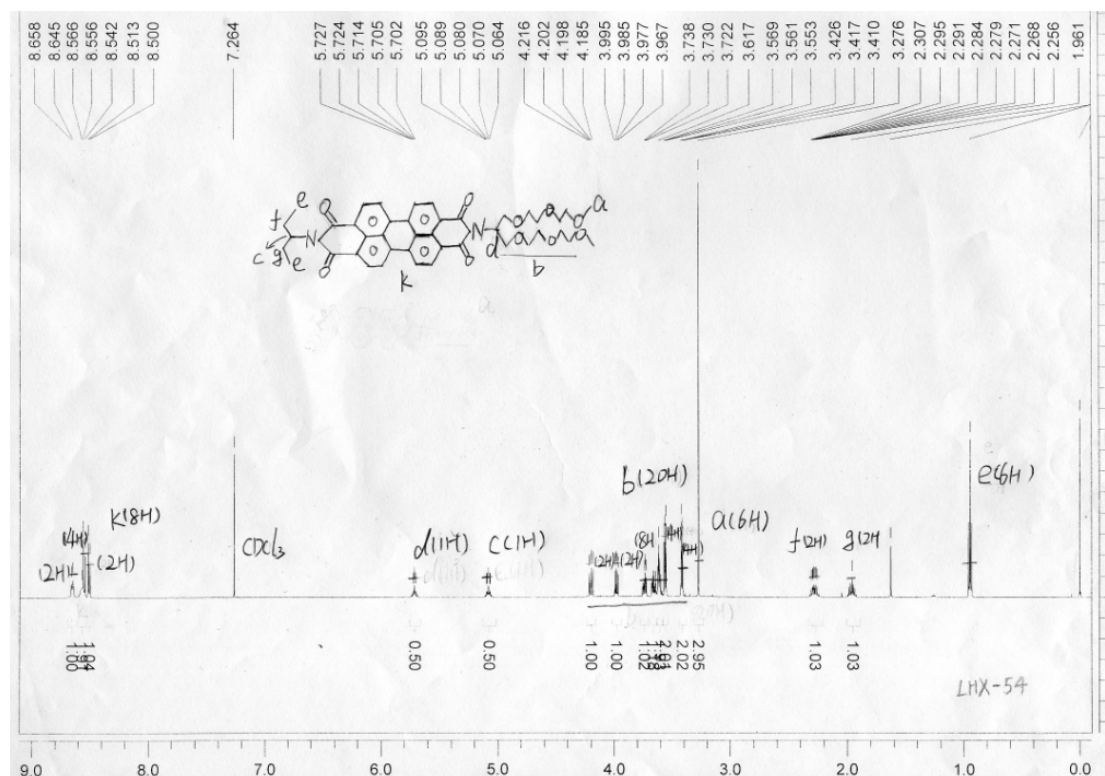

$^1\text{H}$ -NMR spectrum of compound **AG1** in  $\text{CDCl}_3$

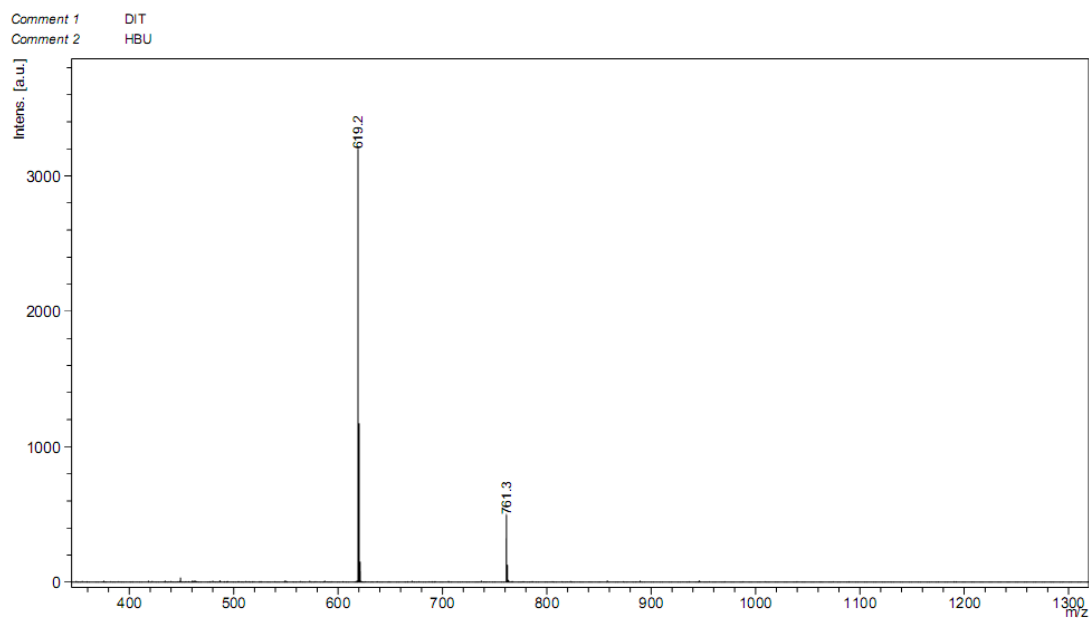

MALDI-TOF spectrum of compound **AG1**

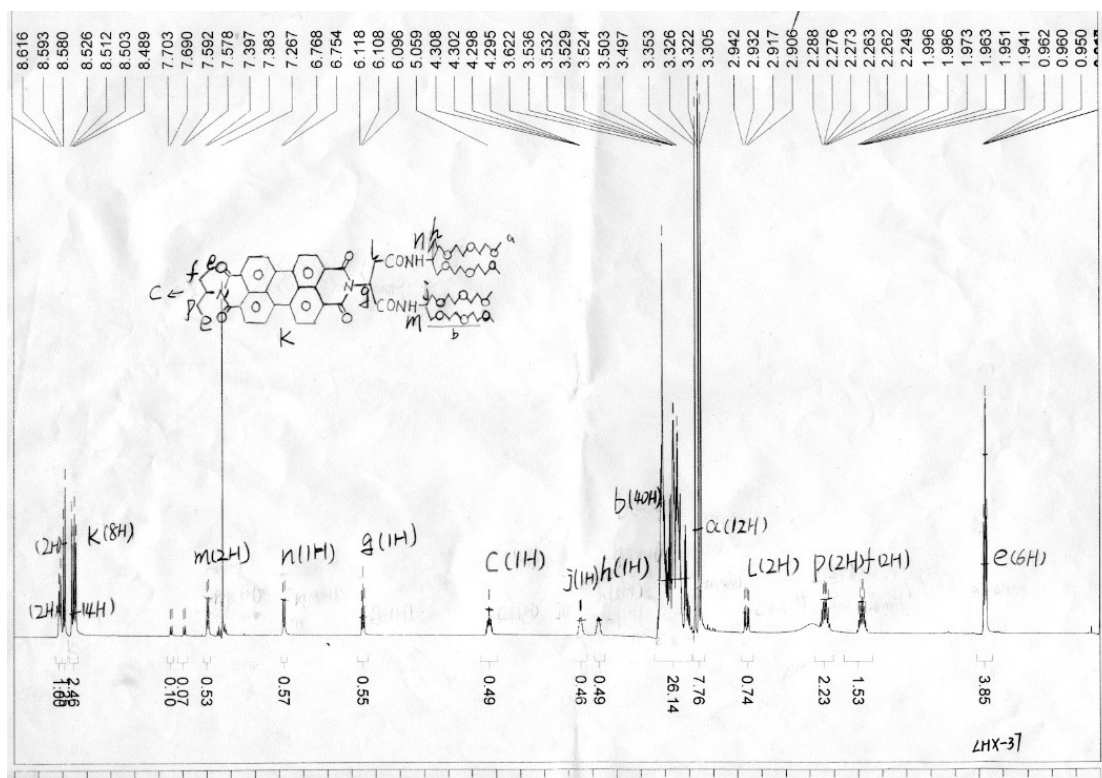

<sup>1</sup>H-NMR spectrum of compound AG2 in CDCl<sub>3</sub>

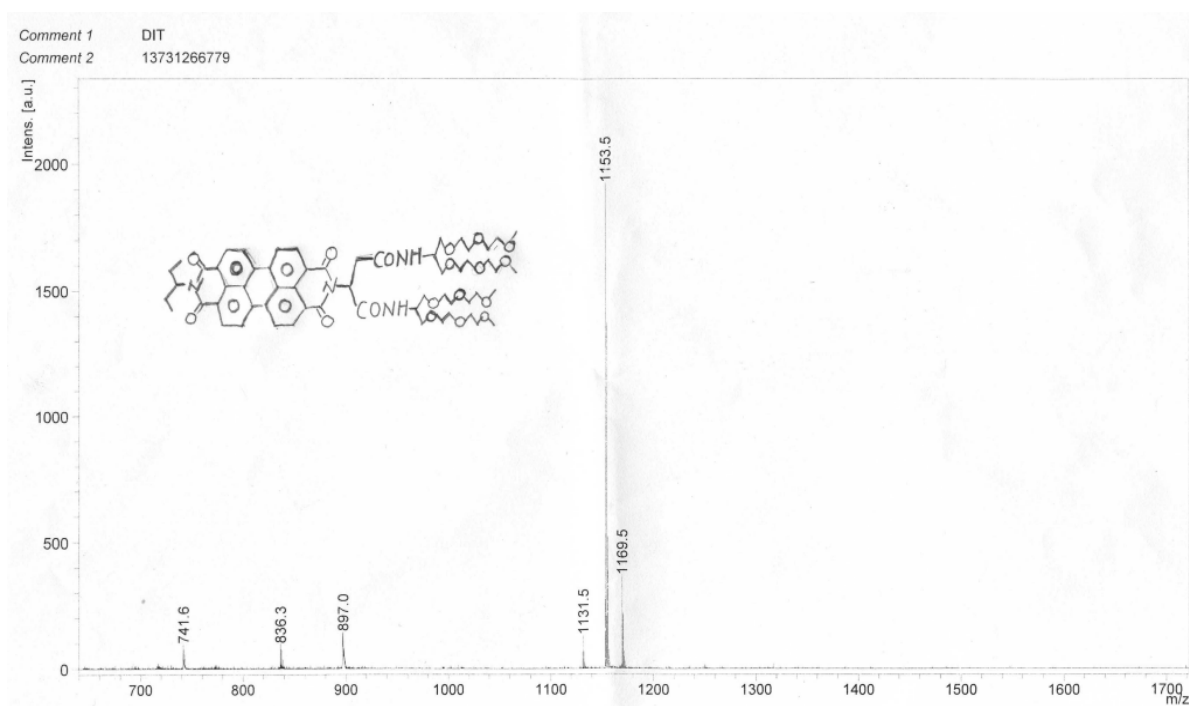

MALDI-TOF spectrum of compound AG2

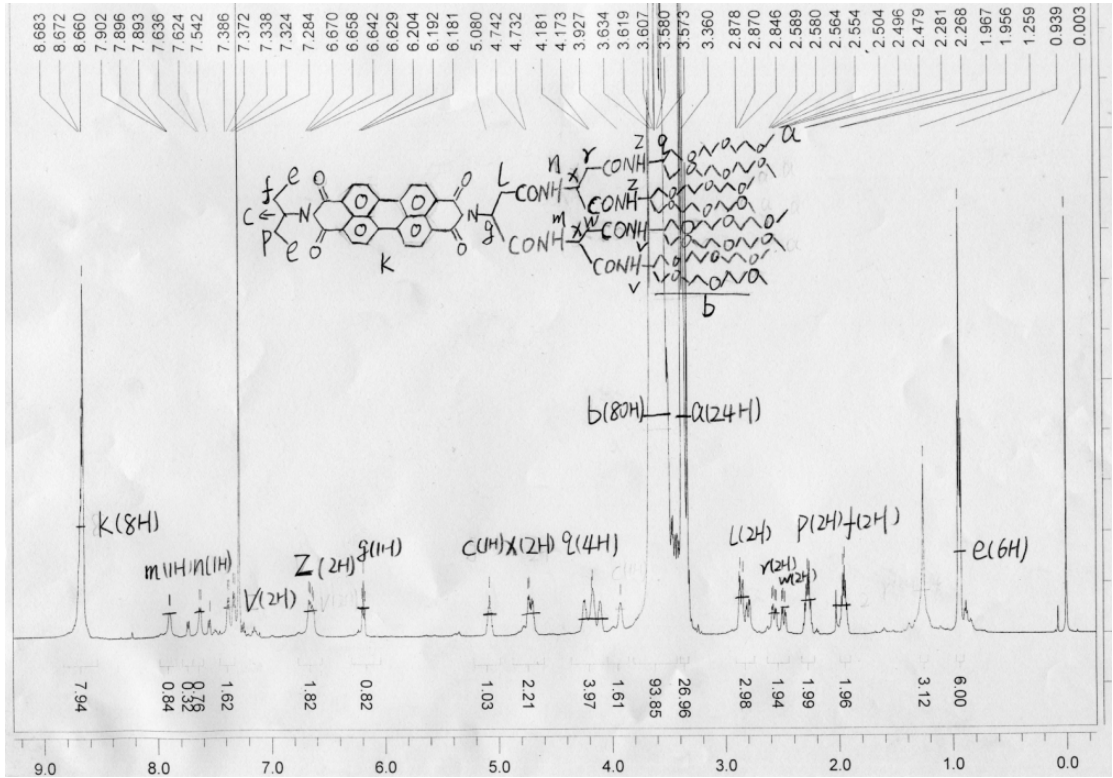

<sup>1</sup>H-NMR spectrum of compound **AG3** in CDCl<sub>3</sub>

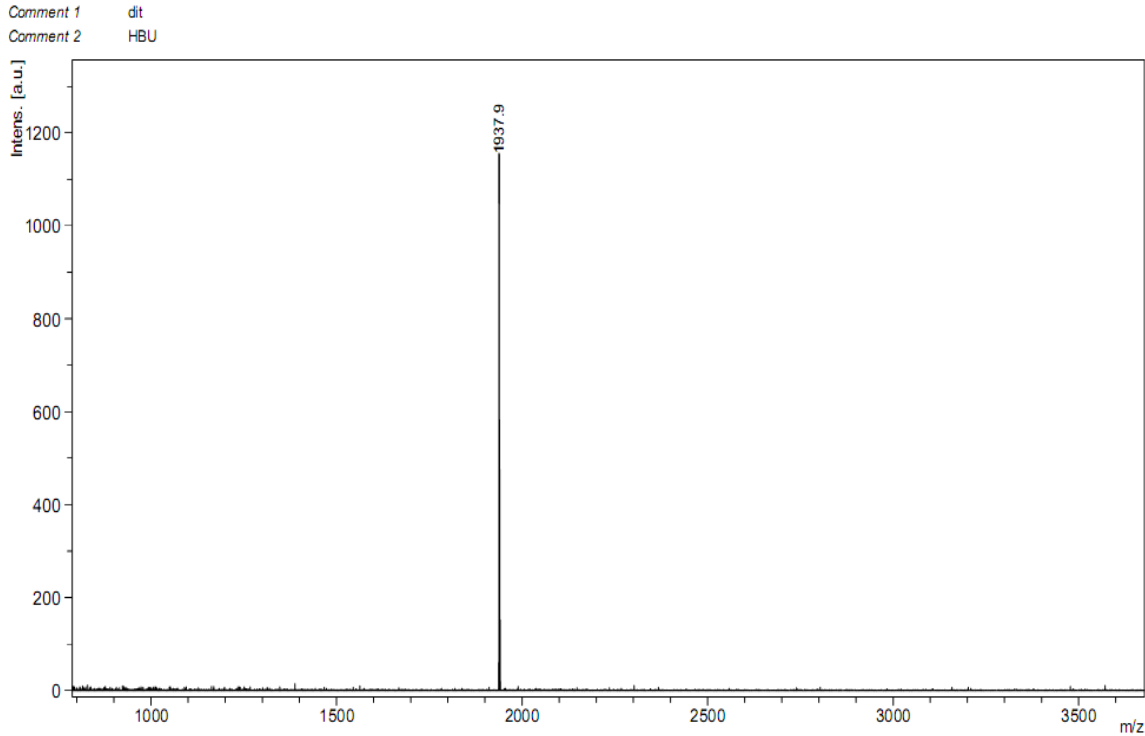

MALDI-TOF spectrum of compound **AG3**
